# Supplementary material for: Development and functionalization of magnetic nanoparticles as stable and reusable catalysts for triacetin synthesis
Source: Royal Society of Chemistry journal article supplement (doi:10.1039/d0nj00488j), 2020-01-01
Supplement: d0nj00488j1.pdf [file d0nj00488j1.pdf]

Electronic supplementary information (ESI) available

## Development and Functionalization of Magnetic Nanoparticles as Stable and Reusable Catalyst for Triacetin Synthesis

Km Abida, Bhupendra Chudasama\*, Amjad Ali

<sup>1</sup>School of Chemistry & Biochemistry, <sup>2</sup>School of Physics & Materials Science

Thapar Institute of Engineering and Technology, Patiala - 147004 (India)

Tel: +91-175-2393443; Fax: +91-175-2364498; Email: [bnchudasama@thapar.edu](mailto:bnchudasama@thapar.edu)

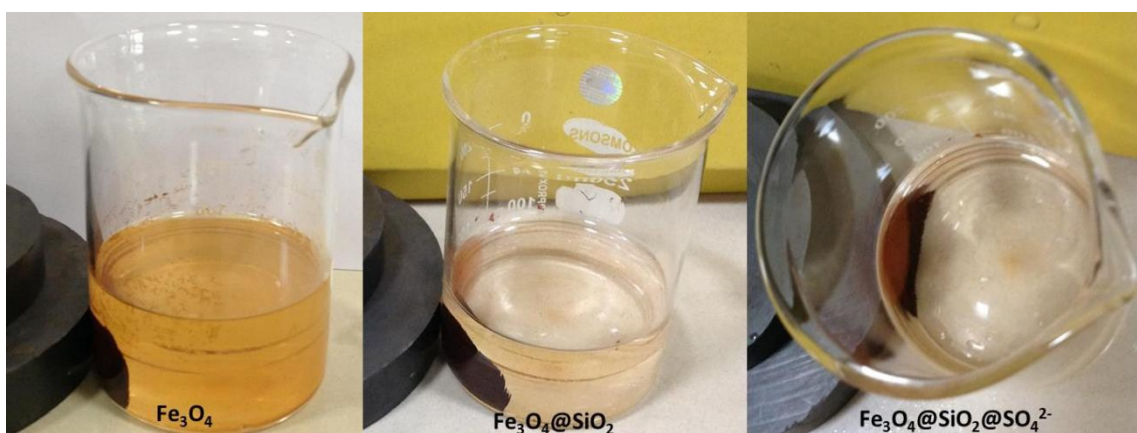

Fig. ESI-1. Magnetic separation with external magnet during preparation of magnetic catalyst.

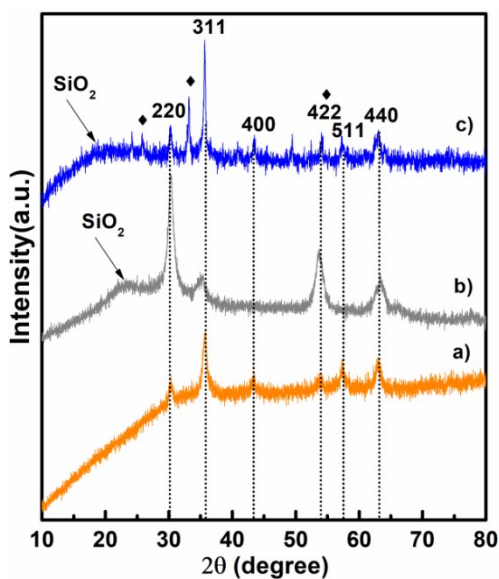

Fig. ESI-2. X-ray diffraction patterns of (a)  $\text{Fe}_3\text{O}_4$ , (b)  $\text{Fe}_3\text{O}_4@\text{SiO}_2$  and (c)  $\text{Fe}_3\text{O}_4@\text{SiO}_2@\text{SO}_4^{2-}$ . (◆-  $\text{Fe}_2(\text{SO}_4)_3$ ).

**Table ESI-1.** Comparison of the BET specific surface area, pore volume and pore diameter of the magnetic catalysts.

| Catalyst                                                                        | BET (m <sup>2</sup> /g) | Pore volume (cm <sup>3</sup> /g) | Pore diameter (nm) | Total acidity (mmol. g <sup>-1</sup> ) |
|---------------------------------------------------------------------------------|-------------------------|----------------------------------|--------------------|----------------------------------------|
| Fe <sub>3</sub> O <sub>4</sub>                                                  | 128.85                  | 0.55                             | 10.6               | 0.32                                   |
| Fe <sub>3</sub> O <sub>4</sub> @SiO <sub>2</sub>                                | -                       | -                                | -                  | 1.27                                   |
| Fe <sub>3</sub> O <sub>4</sub> @SiO <sub>2</sub> @SO <sub>4</sub> <sup>2-</sup> | 69.00                   | 0.30                             | 9.23               | 8.63                                   |

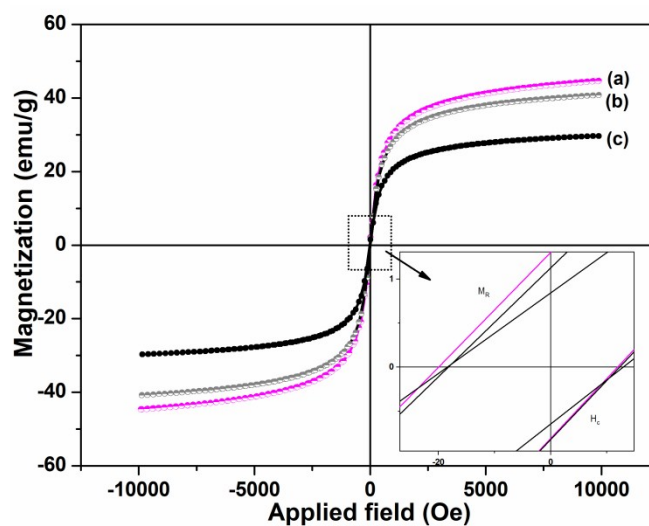

**Fig. ESI-3.** Magnetization curves of (a) Fe<sub>3</sub>O<sub>4</sub>, (b) Fe<sub>3</sub>O<sub>4</sub>@SiO<sub>2</sub> and (c) Fe<sub>3</sub>O<sub>4</sub>@SiO<sub>2</sub>@SO<sub>4</sub><sup>2-</sup>.

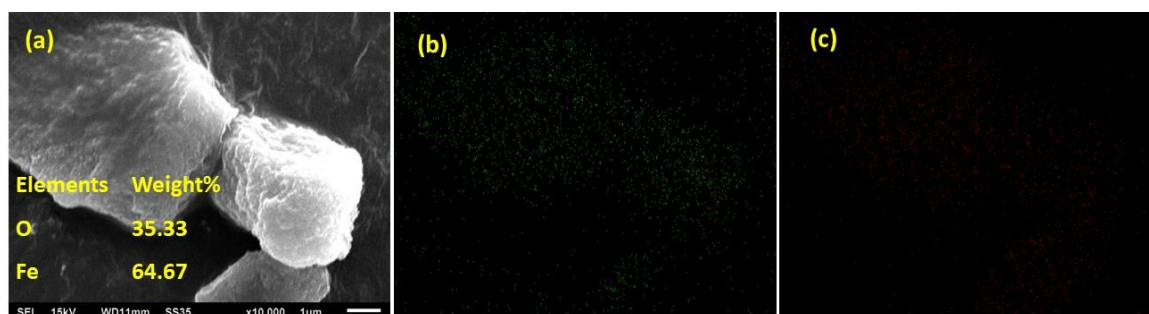

**Fig. ESI-4.** SEM image of (a) Fe<sub>3</sub>O<sub>4</sub> and colour mapping of (b) O and (c) Fe.

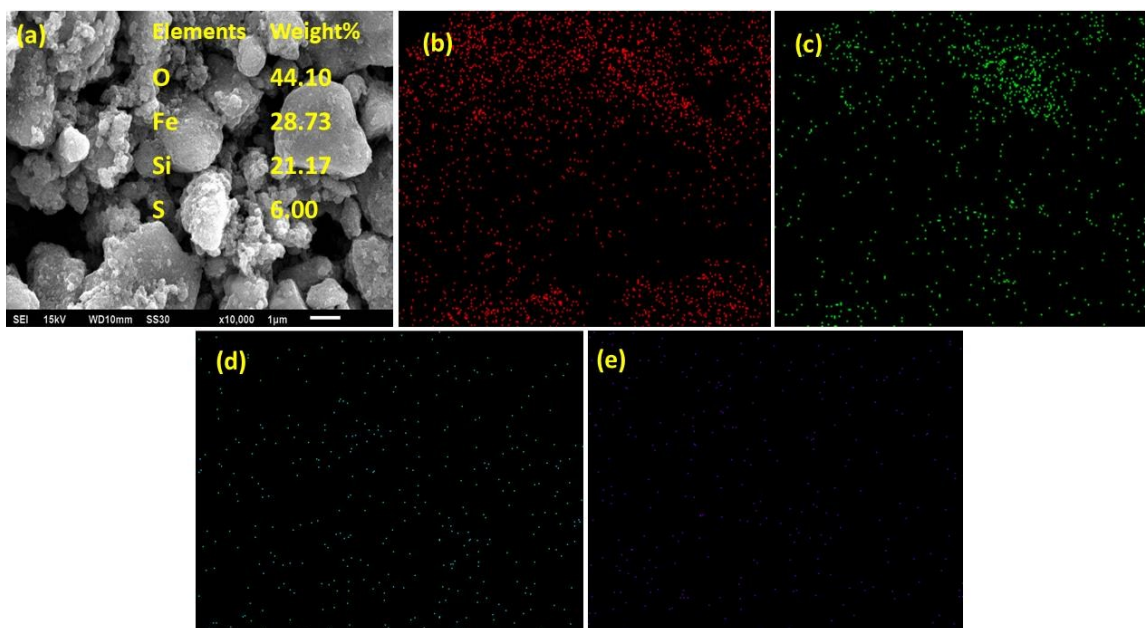

**Fig. ESI-5.** SEM image of (a)  $\text{Fe}_3\text{O}_4@\text{SiO}_2@\text{SO}_4^{2-}$  and colour mapping of (b) O, (c) Fe, (d) Si and (e) S.

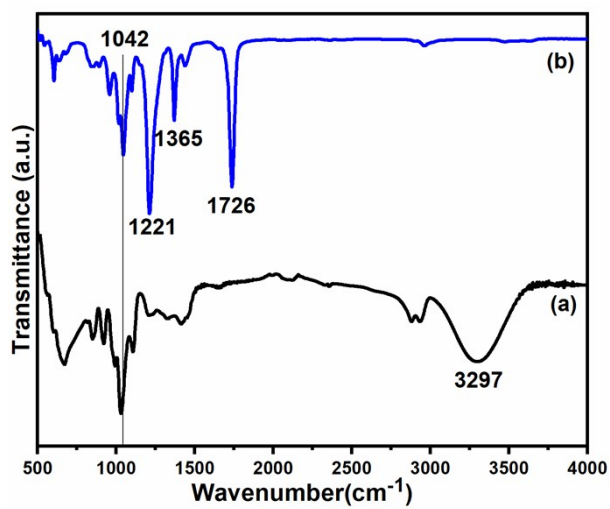

**Fig. ESI-6.** FT-IR spectra of (a) glycerol, and (b) triacetin.

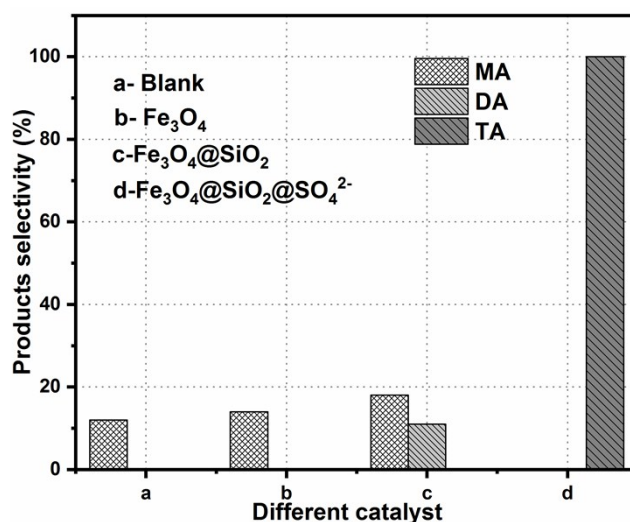

**Fig. ESI-7.** Effect of the various catalysts over the esterification of GL under the optimized reaction conditions:- AcA to GL 6:1, catalyst wt% 5, reaction temperature 80 °C and reaction time 45 min.

**Table ESI-2.** Comparison of the EDS data and other physical parameters coercivity ( $H_C$ ), retentively ( $M_R$ ) and saturation magnetization ( $M_S$ ) of the fresh and regenerated magnetic catalysts.

| Element →            | S (Wt%) | Physical parameters |               |               |
|----------------------|---------|---------------------|---------------|---------------|
|                      |         | $H_C$ (G)           | $M_R$ (emu/g) | $M_S$ (emu/g) |
| Fresh catalyst       | 6.0     | 15.0                | 0.7           | 30.0          |
| Regenerated catalyst | 1.7     | 44.0                | 0.09          | 2.0           |
